# 1 **Generating heterokaryotic cells via bacterial cell-cell fusion**

2

3 Shraddha Shitut<sup>1,2,3</sup>, Meng-Jie Shen<sup>2</sup>, Bart Claushuis<sup>3</sup>, Rico J. E. Derks<sup>4</sup>, Martin  
4 Giera<sup>4</sup>, Daniel Rozen<sup>3</sup>, Dennis Claessen<sup>3</sup>, Alexander Kros<sup>2</sup>

5

6 <sup>1</sup> Origins Centre, Groningen, the Netherlands

7 <sup>2</sup> Dept. Supramolecular & Biomaterials chemistry, Leiden Institute of Chemistry, Leiden  
8 University, the Netherlands

9 <sup>3</sup> Institute of Biology, Leiden University, the Netherlands

10 <sup>4</sup> Center for Proteomics and Metabolomics, Leiden University Medical Center, the  
11 Netherlands

12

13 Correspondence to: [s.s.shitut@lic.leidenuniv.nl](mailto:s.s.shitut@lic.leidenuniv.nl) (SS),

14 [d.claessen@biology.leidenuniv.nl](mailto:d.claessen@biology.leidenuniv.nl) (DC), [a.kros@chem.leidenuniv.nl](mailto:a.kros@chem.leidenuniv.nl) (AK)

15

## 16 **Abstract**

17 Cell-cell fusion is fundamentally important for tissue repair, virus transmission, and  
18 genetic recombination, among other functions. Fusion has been mainly studied in  
19 eukaryotic cells and lipid vesicles, while cell-cell fusion in bacteria is less well  
20 characterized, due to the cell wall acting as a fusion-limiting barrier. Here we use cell  
21 wall-deficient bacteria to investigate the dynamics of cell fusion in bacteria that  
22 replicate without their cell wall. Stable, replicating cells containing differently labeled  
23 chromosomes were successfully obtained from fusion. We find that the rate of cell-cell  
24 fusion depends on the fluidity of cell membranes. Furthermore, we show that not only  
25 the efficiency but also the specificity of cell-cell fusion can be controlled via a pair of  
26 synthetic membrane-associated lipopeptides. Our results provide a molecular handle  
27 to understand and control cell-cell fusion to generate heterokaryotic cells, which was  
28 an important step in the evolution of protocells and of increasing importance for the  
29 design of synthetic cells.

30

31

32

33

34

35

## 36 **Introduction**

37 The structural and functional complexity of modern bacterial cells evolved gradually  
38 over hundreds of millions of years from much simpler enclosed protocells (Szostak,  
39 Bartel, and Luisi 2001). These early cells are thought to have resembled self-  
40 organizing lipid spheres containing stable catalytic activity or primitive metabolism  
41 (Monnard and Deamer 2002), but lacking a rigid cell wall. Lipid vesicles are widely  
42 used to study the behavior of protocells because they are capable of  
43 compartmentalization as well as growth and proliferation (Szostak, Bartel, and Luisi  
44 2001; Adamala and Luisi 2011). Proliferation of such vesicles involves dramatic shape  
45 perturbations, such as fission, tubulation, and vesiculation, which likely preceded the  
46 coordinated cell division of modern walled bacteria (Svetina 2009; Hanczyc and  
47 Szostak 2004). However, because lipid vesicles are inherently limited in terms of their  
48 internal cytoplasmic complexity, consisting of only minimal catalytic components, new  
49 models are needed that more closely resemble protocells to effectively study their  
50 early evolution (Briers *et al.* 2012; Errington *et al.* 2016). This is particularly needed to  
51 examine mechanisms and genetic consequences of cell fusion, an early mechanism  
52 of microbial horizontal gene transfer (Kotnik 2013; Soucy, Huang, and Gogarten 2015;  
53 Naor and Gophna 2013).

54 Cell fusion has been studied in many different eukaryotic cell types (Chen *et al.*  
55 2007) and is crucial for tissue repair and regeneration, phenotypic diversity, viral  
56 transmission and recombination (Ogle, Cascalho, and Platt 2005). The process of  
57 fusion proceeds via several steps: cell adhesion, recognition of cell surface  
58 components, membrane remodelling and in some cases nuclear fusion (Zito *et al.*  
59 2016). These processes are highly influenced by lipid-lipid interactions  
60 (Chernomordik, Kozlov, and Zimmerberg 1995) which have been studied using coarse  
61 grained lipid models and lipid vesicles (Smeijers *et al.* 2006; Marrink and Mark 2003).  
62 Fusion in eukaryotic cells is induced via SNARE proteins that form complexes to  
63 bridge together membranes by pulling cells close to each other (Hanson, Heuser, and  
64 Jahn 1997). The potential for SNARE proteins, or related tools that bridge membranes,  
65 to facilitate bacterial fusion have not yet been explored. Studying cell/membrane  
66 fusion in eukaryotes and lipid vesicles have unravelled details of the molecular  
67 mechanism of membrane fusion; however these systems are highly divergent in terms  
68 of cellular and molecular complexity and are not representative of bacterial fusion,  
69 which may be common in species lacking a cell wall.

70 Many bacterial species can transiently shed their cell wall when exposed to  
71 environmental stressors like cell wall targeting antibiotics and osmotic stress  
72 (Claessen and Errington 2019). When these stressors are removed, wall-deficient  
73 cells can rebuild their cell wall and revert to their walled state. Alternatively, prolonged  
74 exposure to these stressors can lead to the formation of so-called L-forms, which can  
75 efficiently propagate without their wall (Mercier, Kawai, and Errington 2014; Innes and  
76 Allan 2001; Glover, Yang, and Zhang 2009; Studer *et al.* 2016). Much like lipid  
77 vesicles, L-form growth and division is regulated by physicochemical forces that  
78 deform the cell membrane, leading to an irregular assortment of progeny cells.  
79 However, L-forms contain the sophisticated machinery of modern cells which is  
80 lacking in protocell models based on giant lipid vesicles (Briers *et al.* 2012). This  
81 makes them suitable to understanding the dynamics and consequences of cellular  
82 fusion, as well as to identify factors that affect this process.

83 In this study we show that fusion between L-form cells is a dynamic process  
84 whose frequency is dependent on the age of the bacterial culture; this, in turn, is  
85 determined by the fluidity of the cell membrane, which we confirm by chemically  
86 manipulating membrane fluidity. In addition, we demonstrate for the first time that  
87 complementary lipidated coiled coil lipopeptides (structurally similar to SNARE  
88 proteins) increase the efficiency and specificity of cell-cell fusion. Importantly, fusants  
89 resulting from this process are viable and express markers from both parental  
90 chromosomes. This opens up avenues to design complex heterokaryotic/hybrid cells  
91 that have potential not only to answer questions on evolution of complexity but also  
92 enable novel applications in biotechnology.

93

## 94 **Results**

### 95 **A dual marker system for identifying cell-cell fusion**

96 In order to study cell-cell fusion, we created two fluorescent strains by integrating  
97 plasmids pGreen or pRed2 into the *attB* site in the genome of an L-form derivative of  
98 the actinobacterium *K. viridifaciens* (Fig. 1A). The strain carrying pGreen constitutively  
99 expresses EGFP and is apramycin resistant, while the strain carrying pRed2  
100 constitutively expresses mCherry and is hygromycin resistant (Fig. 1A). We first  
101 confirmed resistance to these antibiotics by determining the susceptibility of each  
102 strain to both antibiotics (Fig. 1B, supplementary fig. 1A). The strain expressing  
103 resistance to apramycin (referred to as AG [for Apramycin-Green]) was able to grow

104 at 50  $\mu\text{g mL}^{-1}$  apramycin. The strain that was hygromycin resistant (referred to as HR  
105 [for Hygromycin-Red]) could grow at 100  $\mu\text{g mL}^{-1}$  hygromycin. Resistance to one  
106 antibiotic did not provide cross-resistance to the other. Confirmation of the  
107 fluorescence reporters was obtained via microscopy with cytoplasmic eGFP detected  
108 in the AG strain and mCherry detected in the HR strain (Fig. 1C).

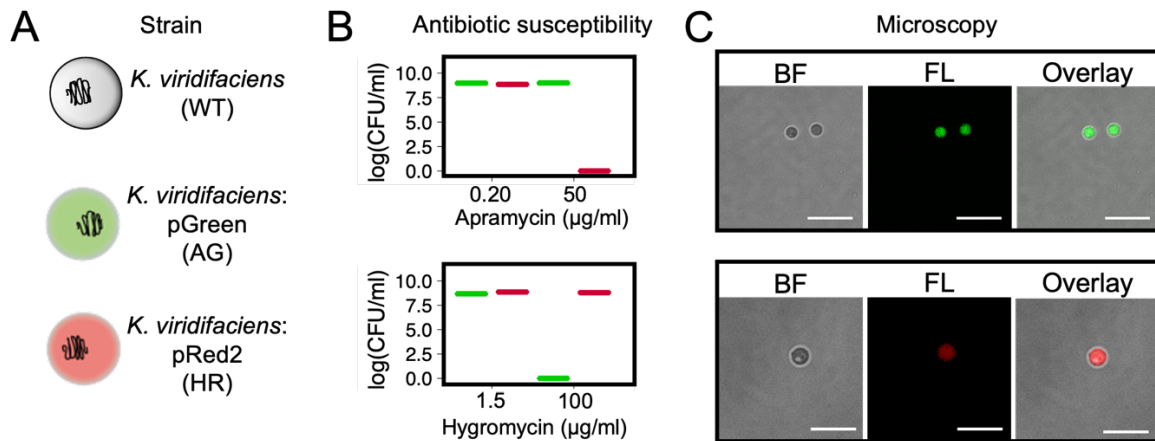

109

110 **Figure 1. L-forms used in the study.** (A) The wildtype *Kitasatospora viridifaciens* delta L-form strain  
111 was genetically modified to either express apramycin resistance and green fluorescence (AG) or  
112 hygromycin resistance and red fluorescence (HR). Each reporter pair (antibiotic resistance+  
113 fluorescence gene) was introduced via a plasmid using the  $\phi\text{C31}$  integration system. (B) Antibiotic  
114 susceptibility testing showed growth of the desired strain at 50  $\mu\text{g/ml}$  apramycin for AG and 100  $\mu\text{g/ml}$   
115 hygromycin for HR. (C) Visual confirmation of fluorescence reporters using microscopy indicated a  
116 positive signal in the green channel for AG and in the red channel for HR. Scale bar represents 10  $\mu\text{m}$ .  
117

### 118 Fusion of L-form using centrifugation and PEG

119 L-forms show structural resemblance to protoplasts that are often used for genome  
120 reshuffling in plants and bacteria via the process of cell-cell fusion. After fusion these  
121 protoplasts can revert back to their walled state. To analyse the ability of L-forms to  
122 fuse, we tested some commonly used methods for protoplast fusion (Kieser *et al.*  
123 2000; Baltz and Matsushima 1981; Gokhale, Puntambekar, and Deobagkar 1993)  
124 namely, mechanical force induced fusion via centrifugation and PEG-mediated fusion  
125 (Fig. 2). Non-specific fusion between AG and HR strains via centrifugation or PEG  
126 could result in three different genotypes: AG/HR, AG/AG and HR/HR. However,  
127 genetically identical fusants (AG/AG and HR/HR) would not grow on selection plates  
128 containing both antibiotics (supplementary fig. 1B). Fusion frequencies determined by  
129 growth on both antibiotics are therefore an underestimate of true fusion rates.  
130 Centrifuging mixtures of AG and HR at 500  $\text{xg}$  resulted in the highest fusion efficiency  
131 (1.5 in  $10^5$  cells); however, the pellet formed in this case was difficult to handle.  
132 Increasing centrifugation to 1000  $\text{xg}$  reduced the fusion efficiency to less than 1 fused

133 cell per  $10^5$  cells, and no fusion was observed at speeds above 6000 xg due to cell  
134 lysis (Fig. 3A). The fusion efficiency in the presence of PEG was highest at 10 w%  
135 PEG with 1 fused cell per  $10^5$  cells (Fig. 3B). Higher PEG concentrations, such as 50  
136 w% that is commonly used for protoplast fusion, caused dramatic cell lysis, suggesting  
137 that the membrane composition of L-forms is different from protoplasts.  
138

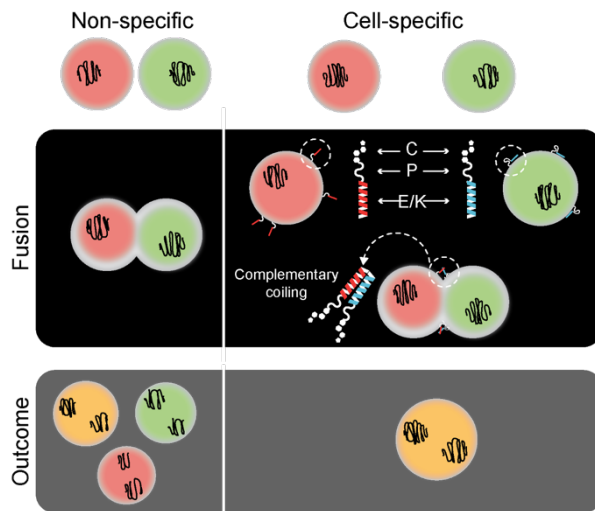

**Figure 2. Schematic of L-form fusion.** Fusion was obtained by two types of methods: non-specific (centrifugation, poly(ethyleneglycol)-PEG) and cell-specific (coiled coil lipopeptides). The process of fusion (black box) and the outcome (grey box) differs in both cases. For non-specific fusion the membranes come together by dehydration induced by PEG or physical centrifugal force. In the case of coiled coil lipopeptides (CPE and CPK), they dock in the membrane using the cholesterol anchor and pull together opposing membranes upon complementary coiling. This complementarity results in fusion of only oppositely labelled cells unlike that in the non-specific methods.

139  
140

141 To verify that the cells growing on plates with both antibiotics (supplementary fig. 1B)  
142 were true fusants, we used microscopy. A small patch of biomass growing on media  
143 with both antibiotics was imaged using fluorescence microscopy (Fig. 3C). The  
144 percent of pixels that were double labelled (i.e. containing both green and red  
145 emission) was higher for cells that had undergone fusion via PEG (21.52%) compared  
146 to centrifugal force (11.92%). These patches of double labelled cells indicate the  
147 presence and subsequent expression of both sets of marker (AG and HR). The  
148 presence of green and red patches in the colonies can be attributed to the fact that  
149 the polyploid L-forms may consist of an unequal ratio of the two chromosome types.  
150 An unequal ratio and expression of markers can lead to a predominantly green (more  
151 AG than HR) or red (more HR than AG) colony appearance. Taken together these  
152 results show that cell-cell fusion of L-forms is possible and that the resulting colonies  
153 contain both chromosomes.

154  
155  
156

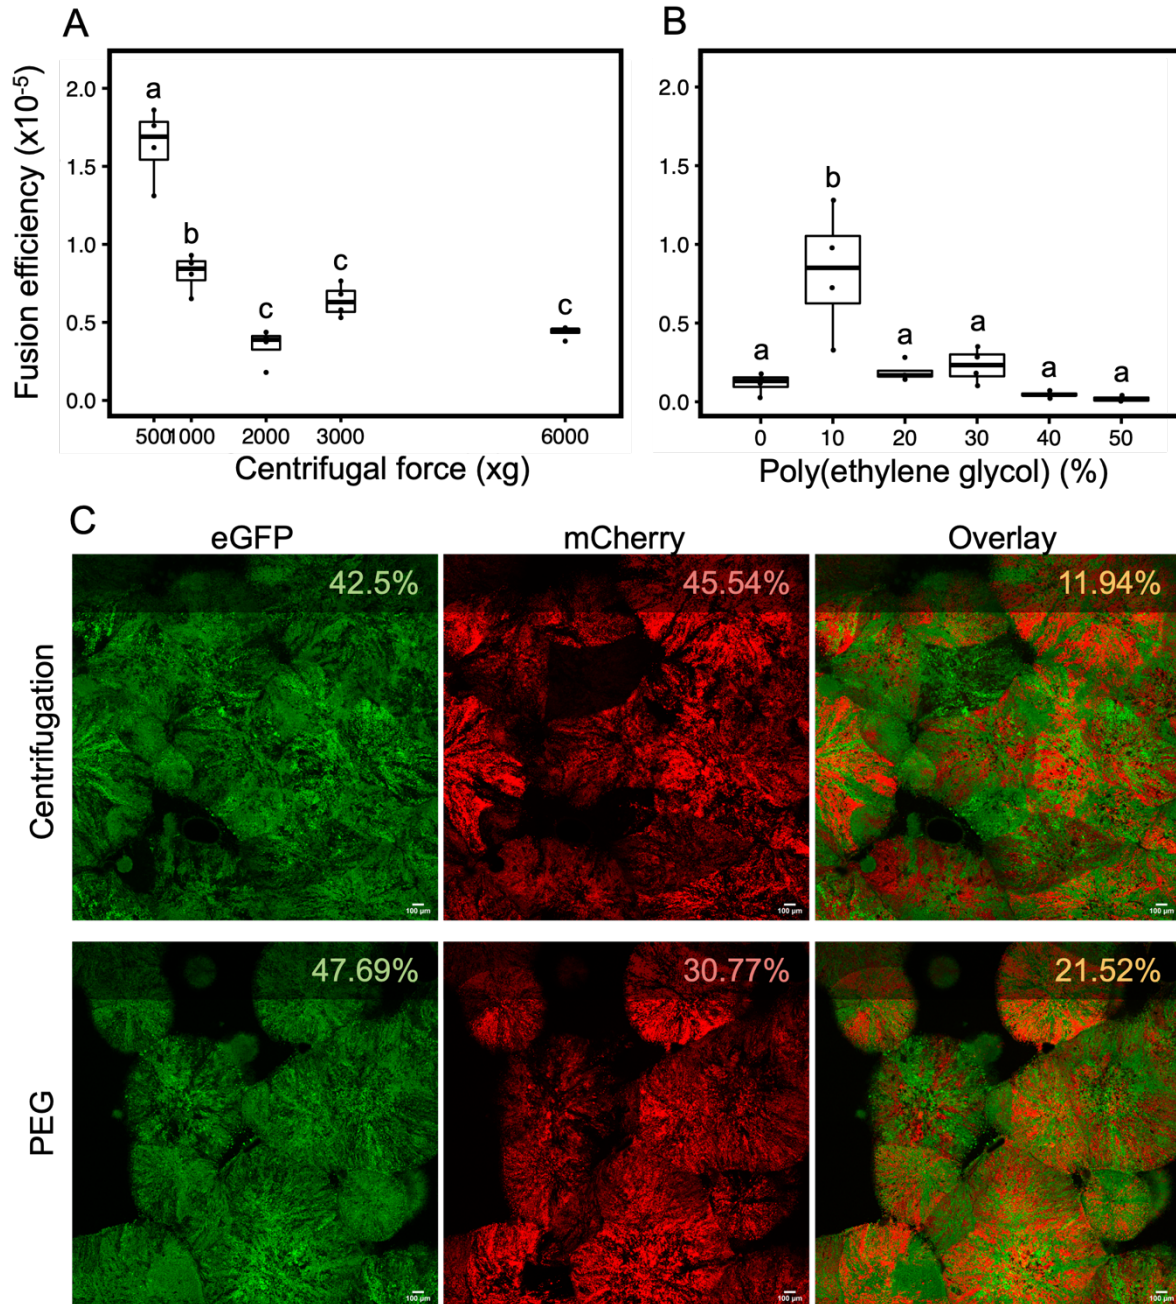

157

158 **Figure 3. Cell-cell fusion of L-forms.** Non specific cell fusion was carried out using either a physical  
 159 method (centrifugation (A)) or chemical method (poly(ethyleneglycol) (B)). The fusion efficiency was  
 160 calculated by dividing the total cell count obtained on double selection media with the cell count of  
 161 individual parent strain (AG or HR). Increasing centrifugal force leads to a decrease in efficiency (one-  
 162 way ANOVA,  $f=15$ ,  $p=9.77 \times 10^{-9}$ , groupwise comparison Tukey's HSD). Poly(ethyleneglycol)  
 163 concentrations also affected fusion efficiency (one-way ANOVA,  $f=22$ ,  $p=0.033$ , groupwise comparison  
 164 Tukey's HSD) with 10 %w resulting in the highest efficiency of fusion. (C) Fluorescence microscopy of  
 165 colonies on double antibiotic media after fusion via centrifugation (top panel) and PEG 10 %w (bottom  
 166 panel). Fluorescence expression (EGFP and mCherry) is indicated as percent in the top right corner of  
 167 each image and was calculated using ImageJ/Fiji. The overlay image (third column) shows the percent  
 168 or area occupied by both green and red pixels and is slightly higher for PEG induced fusion. Scale bar  
 169 = 100  $\mu$ m.

170

171

172

173 **Fused cells are viable and can proliferate**

174 Successful cell-cell fusion events between different L-form strains combines the  
175 cytoplasmic contents and genomes of these cells. To study whether these fused cells  
176 (*i.e.* fusant) are viable, timelapse microscopy of individual cells was performed. In  
177 viable growing L-forms, membrane extension and blebbing takes place first along with  
178 deformation of cell shape (Mercier, Kawai, and Errington 2013; Studer *et al.* 2016).  
179 This is followed by daughter cell formation which tend to remain attached to the mother  
180 cell. Given the non-binary nature of cell division in wall deficient cells it was difficult to  
181 track the exact number of daughter cells originating from one mother cell. Using the  
182 wildtype L-forms as a reference for cell growth we looked for the same pattern in fused  
183 cells which were viable in the presence of both antibiotics. Colonies from a fusion  
184 event were inoculated in double selection liquid media to obtain suspended cultures  
185 that could be introduced into a 96 well plate for timelapse imaging in an automated  
186 microscope. We applied brightfield and fluorescence imaging every 10 min for over a  
187 period of 16 hours (Fig. 4). Importantly, the fused L-forms follow the growth  
188 characteristics of wild-type/parental strains as evidenced by blebbing and membrane  
189 deformation, as well as smaller daughter cells visibly attached to mother cells (Fig. 4,  
190 supplementary movie 1). The fusants also show growth upon subculture into fresh  
191 medium containing both selection pressures (supplementary Fig. 2).

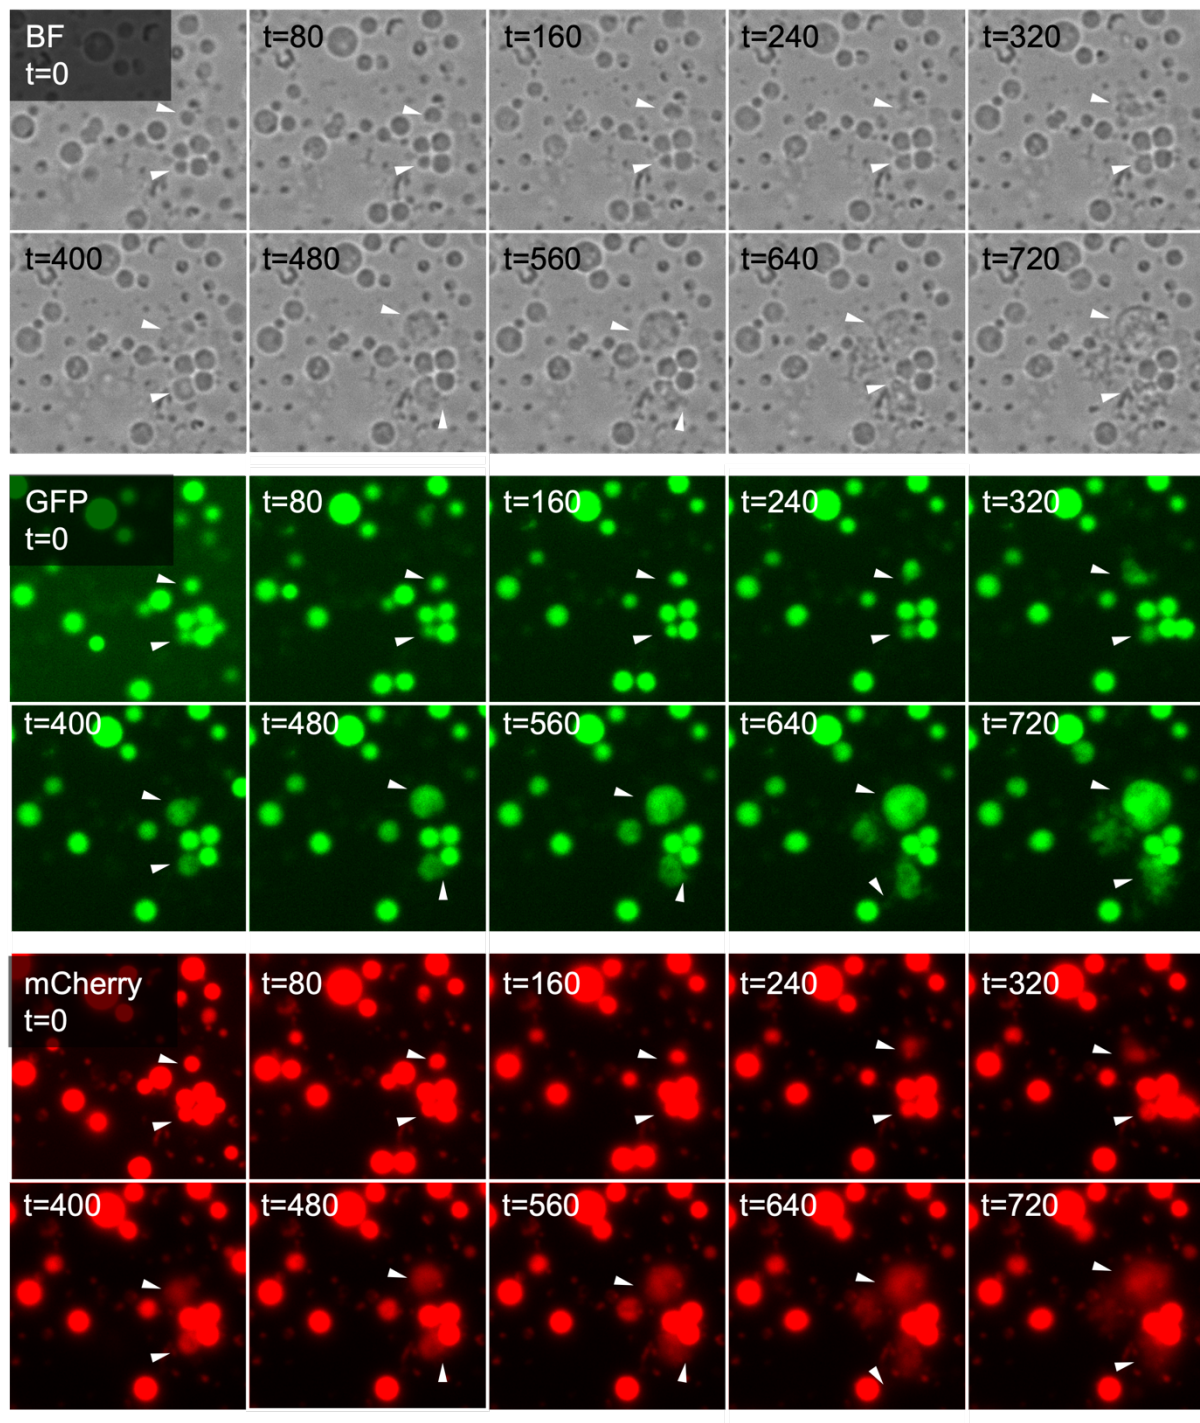

192

193 **Figure 4. Viability of fused cells.** Growth and division of fused cell was tracked over time with  
194 brightfield (BF) and fluorescence (GFP and mCherry) microscopy. Images were taken every 10 minutes  
195 for a total of 16 hours. The panels (top-BF, middle-GFP, bottom-mCherry) consist of a select few images  
196 over this time period (labelled on the top left corner in minutes). White arrows indicate growing cells  
197 and membrane extensions. Fused cells also express both fluorescence markers made possible due to  
198 cell-cell fusion.

199

## 200 **Membrane fluidity influences fusion efficiency.**

201 The bacterial cell membrane largely consists of (phospho)lipids and fatty acids,  
202 together with other minor components. The characteristics of these lipids and fatty



203 acids (FA), such as the degree of unsaturation and headgroup composition, determine  
204 the physical properties of a membrane. The fluidity of membranes is an important  
205 factor governing its fission and fusion ability (Mercier, Domínguez-Cuevas, and  
206 Errington 2012; Prives and Shinitzky 1977). Membrane fluidity of L-form cells was  
207 quantified as generalized polarization (GP) using the Laurdan dye assay (Scheinpflug,  
208 Krylova, and Strahl 2017). This GP value can range from -1 to +1 and inversely  
209 correlates to membrane fluidity (*i.e.*, a low GP value indicates a more fluid membrane).  
210 Measuring the fluidity for L-forms grown for 1, 3, 5 and 7 days, resulted in a significant  
211 GP value increase over time (Fig. 5A,  $\rho=0.732$ ,  $p=1.87 \times 10^{-6}$ ), indicating that  
212 membrane rigidity increases as the cultures age. Importantly, this change in fluidity  
213 with culture age negatively correlated with the fusion efficiency, as younger cultures  
214 fused at twice the efficiency of older cultures (Fig. 5A inset, unpaired t test,  $p=2.22 \times 10^{-6}$ ).  
215 To assess the underlying molecular causes for this shift in fluidity, the membrane  
216 lipid and FA composition was analyzed using mass spectrometry from L-form cultures  
217 of different ages. Over a 7-day period, there was a significant shift in (phospho)lipid/FA  
218 composition as the fraction of saturated FAs increased at the expense of unsaturated  
219 FAs (Fig. 5B, top panel). This change is consistent with previous reports in  
220 *Streptomyces sp.* and *Bacillus sp.* showing that membrane fluidity decreases due to  
221 the presence of saturated FAs that stack tightly and thereby make membranes rigid  
222 (Mercier, Domínguez-Cuevas, and Errington 2012; Hoischen *et al.* 1997). In addition,  
223 the percent of phosphatidylethanolamine (PE) which is known to affect membrane  
224 curvature declines with culture age in L-forms. Both factors, an increase in saturated  
225 FAs and a decrease in PE, likely underlie the shift in fusion frequency with colony age,  
226 although by different mechanisms.

227 To causally confirm the impact of membrane fluidity with fusion efficiency, we  
228 directly manipulated membrane fluidity by adding PEG into the medium, which is  
229 known to induce fusion between two membranes by hydrogen bonding and force  
230 adjacent membranes into close proximity via dehydration (MacDonald 1985;  
231 Wojcieszyn *et al.* 1983). When we tested the effect of increasing PEG concentrations  
232 on L-form membrane fluidity, we observed a significant positive correlation between  
233 GP values and PEG concentrations ( $\rho=0.834$ ,  $p=1.41 \times 10^{-6}$ ) (Fig. 5C) This shows  
234 that an increase in PEG leads to reduced membrane fluidity in L-forms. In turn, this  
235 caused a decrease in fusion efficiency. Thus a high GP value (*i.e.* low membrane  
236 fluidity) results in low fusion ( $\rho=-0.762$ ,  $p=3.74 \times 10^{-5}$ ) (Fig. 5D).

237 Taken together these results show that increased membrane fluidity facilitates  
238 fusion, which varies naturally during the growth of L-form cells and can be chemically  
239 manipulated by the addition of PEG.

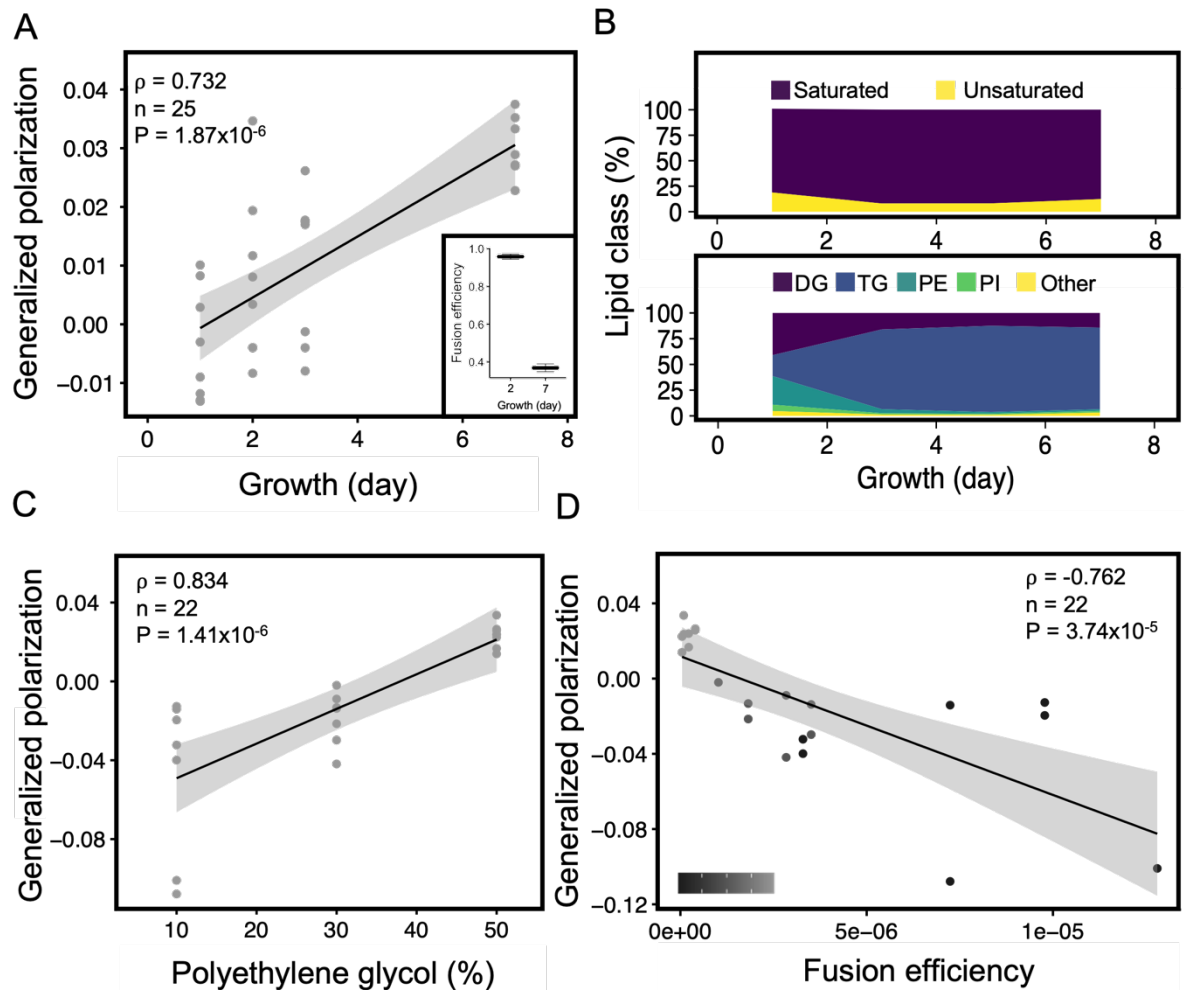

240

241 **Figure 5. Membrane fluidity affects L-form fusion.** (A) Fluidity of L-form membranes was quantified  
242 as a generalized polarization (GP) value using the Laurdan dye assay. A strong positive correlation was  
243 obtained between GP value and the period of growth indicating a decrease in membrane fluidity with  
244 increasing culture age (Spearman's rank correlation test). Age of the culture also has an effect on fusion  
245 efficiency (inset, 2 sample t test,  $p = 2.22 \times 10^{-6}$ ,  $n = 3$ ) with young 2 day old cultures fusing more efficiently  
246 than older 7 day old cultures. (B) Analysis of membrane lipids of cultures from different period of growth  
247 (1, 3, 5 and 7 day) indicated a change in the percent of saturated and unsaturated fatty acids over time.  
248 Specifically the triglyceraldehyde (TG) and phosphatidylethanolamine (PE) show a strong decrease  
249 between 1 and 3 day. Both lipids are required for fluidity of the membrane. (C) Positive correlation  
250 obtained between GP value and the percent of PEG indicating a decrease in membrane fluidity with  
251 increasing concentration of PEG (Spearman's rank correlation test). (D) The GP value shows a strong  
252 negative correlation with fusion efficiency. A low percent of PEG (10%) leads to slightly more fluid  
253 membranes compared to a high PEG percent (50%) resulting in higher fusion (Spearman's rank  
254 correlation test). The grayscale (bottom left corner) indicates PEG percent ranging from 10 to 50.

255

256

257

258 **Coiled coil lipopeptides localize to L-form membranes and alter membrane**  
259 **fluidity**

260 PEG-mediated fusion and centrifugation cause non-specific cell fusion and this can  
261 result in a low percent of fused cells expressing both EGFP and mCherry (Fig. 2). The  
262 recent use of lipidated peptides in cell fusion has shown great promise to improve  
263 fusion efficiency, with examples of successful fusion between liposomes or liposomes  
264 with various eukaryotic cell lines (Rabe *et al.* 2014; Yang, Shimada, *et al.* 2016; Kong  
265 *et al.* 2020; Yang, Bahreman, *et al.* 2016). Coiled coil is a common protein structural  
266 motif (supplementary Fig. 3) that contains two or more alpha-helices wrapped around  
267 each other to form a left-handed superhelical structure (Koukalová *et al.* 2018; Robson  
268 Marsden and Kros 2010). In previous studies, *de novo* designed coiled coil forming  
269 lipopeptides K<sub>4</sub> and E<sub>4</sub> were conjugated to cholesterol via a flexible PEG-4 spacer,  
270 yielding lipopeptides denoted as CPK<sub>4</sub> and CPE<sub>4</sub> (Versluis *et al.* 2013; Zope *et al.*  
271 2013). Using this coiled coil membrane fusion system, efficient liposome-liposome and  
272 cell-liposome fusion has been achieved resulting in efficient cytosolic delivery of cargo  
273 (Rabe *et al.* 2014; Yang, Shimada, *et al.* 2016; Kong *et al.* 2020). Since L-forms do  
274 not possess a cell wall and its outer membrane is structurally similar to (giant) lipid  
275 vesicles, we investigated whether coiled-coil lipopeptides CPE<sub>4</sub>/CPK<sub>4</sub> can be applied  
276 to increase the L-form fusion efficiency and introduce cell-specificity. First, we tested  
277 whether lipopeptide CPK<sub>4</sub> could be inserted in the L-form membrane and still form a  
278 coiled coil with its binding partner lipopeptide E<sub>4</sub> (Fig. 2, supplementary fig. 3).  
279 Incorporating the CPK<sub>4</sub> lipopeptide in the membrane allowed docking of the  
280 complementary fluorescent labeled peptide E<sub>4</sub> (fluo-E<sub>4</sub>; Fig. 6A). Docking was also  
281 observed when CPE<sub>4</sub> was incorporated in the L-form membrane, followed by the  
282 addition of fluorescent labeled peptide fluo-K<sub>4</sub>. In contrast, no fluorescence was  
283 observed when only fluo-K<sub>4</sub> or fluo-E<sub>4</sub> was added to L-forms (Fig. 6B). Using image  
284 analysis software, we further confirmed membrane localization of the lipopeptide-  
285 fluorescent dye conjugate by assessing the fluorescence intensity across the cell  
286 along a transect line. A combined plot (supplementary fig. 4) of these intensity values  
287 across 10 cells indicates coinciding peaks of fluorescence values of the lipopeptide  
288 conjugates with that of gray values of the cell membrane (seen as dark grey rings in  
289 brightfield images). The fluorescence intensity on L-form membranes was more  
290 distinct when CPE<sub>4</sub>/fluo-K<sub>4</sub> was used as compared to CPK<sub>4</sub>/fluo-E<sub>4</sub> (supplementary  
291 fig. 4A). Altogether, these results demonstrate for the first time that lipopeptides can

292 be readily incorporated into L-form membranes and serve as a docking point for the  
293 complementary (lipo)peptides.

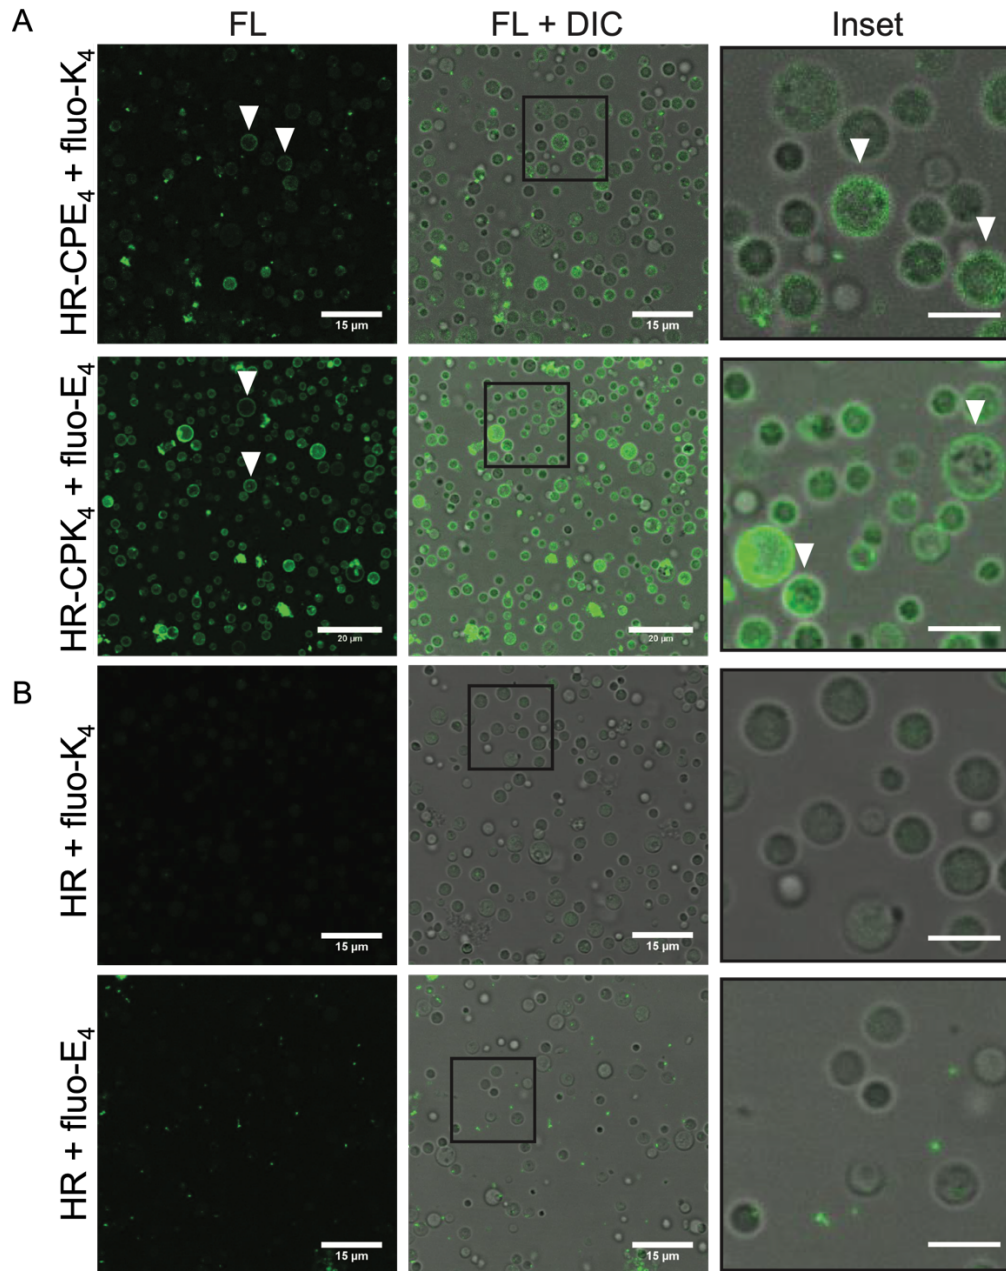

294

295 **Figure 6. Coiled coil lipopeptides integrate in L-form membranes.** (A) Confocal microscopy images  
296 (fluorescence (FL) and overlay (FL+DIC)) indicating peptide CPE<sub>4</sub> or CPK<sub>4</sub> insertion into the L-form  
297 membranes and coiled-coil formation with complementary peptides (fluo-K<sub>4</sub> or fluo-E<sub>4</sub>). White arrows  
298 indicate clear membrane insertion. (B) In the absence of CPE<sub>4</sub> or CPK<sub>4</sub> no binding of the complementary  
299 fluorescent peptides (fluo-K<sub>4</sub> or fluo-E<sub>4</sub>) was observed. Experiments were performed at 30°C, L-forms  
300 in P-buffer were incubated with 10 μM of CPE<sub>4</sub> or CPK<sub>4</sub> for 30 minutes. Subsequently the unbound  
301 peptide was washed via centrifugation and the complementary fluorescent peptides were added. Scale  
302 bar = 5 μM.

303

304 The incorporation of lipopeptides in L-form membranes prompted us to  
305 investigate whether they also influenced membrane fluidity. To test this, L-forms

306 expressing red fluorescent protein (AR and HR strains) were modified with either non-  
307 fluorescent labeled CPE<sub>4</sub> and CPK<sub>4</sub> so as not to interfere with the emission spectra of  
308 the Laurdan dye. The observed GP values reveal that CPK<sub>4</sub> and CPE<sub>4</sub> affect the  
309 fluidity of L-forms differently. While CPE<sub>4</sub> decreased fluidity in the AR strain (Fig. 7A),  
310 both lipopeptides increased fluidity in the HR strain (Fig. 7B). Interestingly the effect  
311 of increased fluidity due to PEG (10 w%) was only observed in the AR strain. These  
312 differences in fluidity effects are likely caused by the presence of antibiotics during  
313 culturing of the strains prior to the experiment, which are required to avoid  
314 contamination in the cultures (supplementary fig. 5). Antibiotics are known to affect  
315 membrane fluidity (Bessa, Ferreira, and Gameiro 2018), however the exact  
316 mechanism by which they do so is unclear. This inherent difference was observed in  
317 the basal GP values of control samples (-0.02 for HR and -0.08 for AR, Fig. 7A-B) as  
318 well as in separate measurements for fluidity of strains in the absence and presence  
319 of antibiotics (0.01 for HR and -0.10 for AR, supplementary fig. 5). However, all  
320 treatments (PEG/lipopeptide) are compared to the control sample of individual strain  
321 type; hence, the change in GP value is indeed due to the lipopeptide interaction and  
322 the to the presence of antibiotics.

323 We next examined how these changes in fluidity affect the process of  
324 lipopeptide-mediated fusion. For this, L-form cultures were first adjusted to the same  
325 density and split into aliquots. The aliquots were then either untreated (control), treated  
326 with PEG or increasing concentrations of the lipopeptide that previously caused an  
327 increase in fluidity. HR strains were hence pretreated with CPE<sub>4</sub> and AG strains were  
328 treated with CPK<sub>4</sub>. After treatment for 30 minutes the excess PEG and lipopeptides  
329 were removed by centrifugation and the L-forms were resuspended in fresh P-buffer  
330 containing Dnasel. The cultures were then thoroughly mixed in a 1:1 ratio, incubated  
331 for 30 minutes at 30°C and subsequently plated on selection media for cell  
332 quantification. The observed fusion efficiency for each treatment relative to control  
333 revealed that treatment of HR with CPE<sub>4</sub> and AG with CPK<sub>4</sub> results in a high fusion  
334 efficiency as compared to 10 w% PEG or the centrifuged control (Fig. 7C).  
335 Furthermore, fusion efficiency was not only dependent on lipopeptide concentration  
336 (i.e. decreased fusion at 100 μM) but also on the lipopeptide specificity since AG  
337 treated with CPE<sub>4</sub> resulted in basal level of fusion similar to the control. Higher  
338 lipopeptide concentrations also visibly affected cells, causing lysis (data not shown).

339 Together these results confirm that cell specific fusion of L-forms can be achieved  
340 using fusogenic coiled coil lipopeptides.

341 The two approaches (non-specific via PEG and centrifugation and cell-specific  
342 using lipopeptides) used here seem to influence fusion by altering membrane fluidity  
343 and bringing membranes together. We then investigated whether combining both  
344 fusogens would result in an overall higher fusion efficiency. For this the cells were first  
345 treated with the lipopeptides (AG L-forms with CPK<sub>4</sub> and HR L-forms with CPE<sub>4</sub>) and  
346 split into two aliquots. The first aliquot was directly subjected to fusion by mixing the  
347 cultures in a 1:1 ratio whereas the second aliquot was mixed and treated with PEG.  
348 Here the PEG remained in the environment during the process of fusion. Efficiency  
349 calculations showed a 3-fold higher relative fusion in the latter (Fig. 7D) indicating that  
350 combining lipopeptides and PEG is optimal for cell-cell fusion. The presence of  
351 lipopeptides on the cell surface aids in complementary L-form pairing (AG with HR)  
352 bringing the opposing membranes in close proximity, which is an important first step  
353 in fusion. Additionally PEG potentially further reduces the space by membrane  
354 dehydration thus facilitating fusion events. Colony imaging further confirmed the  
355 presence of more double labelled cells in treatment with PEG (supplementary Fig. 6).

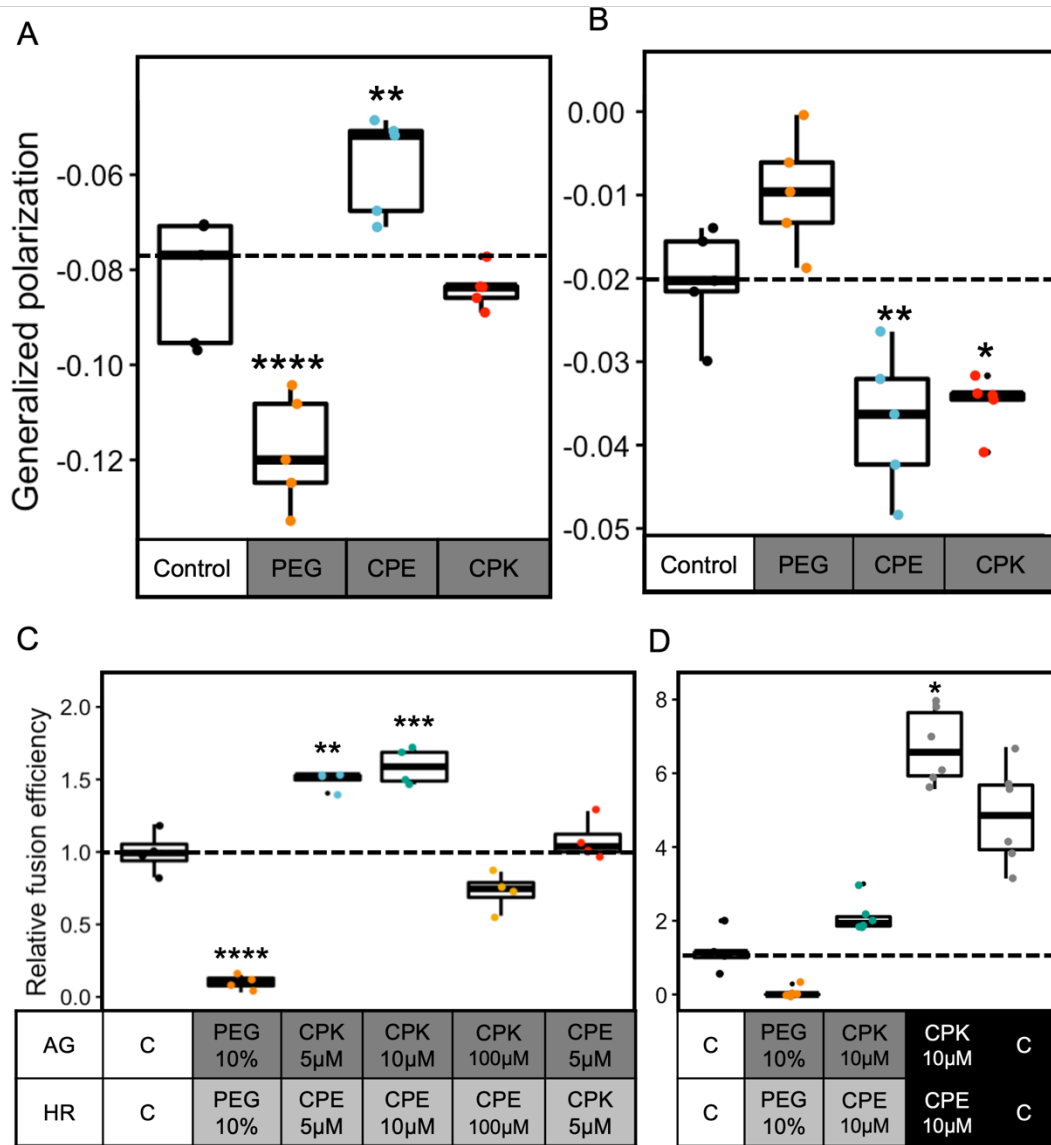

356

357

358

359

360

361

362

363

364

365

366

367

368

369

370

371

372

373

374

375

376

377

**Figure 7. Coiled coil lipopeptides increase membrane fluidity and cell-specific fusion.** (A) The strain AR shows an increased fluidity on treatment with PEG ( $p=3.06 \times 10^{-6}$ ), a decrease in fluidity on treatment with CPE<sub>4</sub> ( $p=2.13 \times 10^{-3}$ ) and no change in fluidity with CPK<sub>4</sub> (One-way ANOVA,  $F=36$ ,  $p=4.59 \times 10^{-18}$  followed by Tukey's pairwise comparison) compared to the control (dotted line). (B) The strain HR shows increased fluidity (low GP value) when treated with CPE<sub>4</sub> ( $p=3.11 \times 10^{-3}$ ) and CPK<sub>4</sub> ( $p=1.4 \times 10^{-2}$ ) compared to the control (dotted line) whereas no significant change when treated with 10% PEG (One-way ANOVA,  $F=36$ ,  $p=2.83 \times 10^{-18}$  followed by Tukey's pairwise comparison). Dotted line is for comparison of GP values to the control where no peptide or PEG was added. (C) The AG and HR strains were individually treated with either PEG, CPE<sub>4</sub> or CPK<sub>4</sub> at different peptide concentrations to assess the effect on fusion efficiency. Interestingly PEG leads to low fusion despite increasing fluidity because of its non-specific nature. The combination of AG-CPK<sub>4</sub> and HR-CPE<sub>4</sub> resulted in highest fusion efficiency relative to the basal level. The increase in relative fusion efficiency is concentration dependent as well as peptide dependent (One-way ANOVA,  $F=30$ ,  $p=3.47 \times 10^{-14}$  followed by Tukey's pairwise comparison). (D) The AG and HR strains were first treated with either PEG, CPE<sub>4</sub> or CPK<sub>4</sub>. These strains were then directly plated on double selection media in the absence (grey boxes) or presence (black boxes) of 10%w PEG to assess the effect on fusion efficiency. Interestingly PEG leads to low fusion despite increasing fluidity because of its non-specific nature when washed away prior to plating but gives a high efficiency when present during the plating. The treatment with peptides also shows a higher efficiency when in the presence of PEG (Kruskall-Wallis chi-squared = 24.84,  $p=5.4 \times 10^{-5}$ , followed by Dunnett's pairwise comparison) compared to the control where no peptide or PEG was added (dotted line).

## 378 Discussion

379 Cell wall deficiency has primarily been studied in the context of stress tolerance and  
380 intracellular pathogenicity (Errington *et al.* 2016). The genetic and metabolic  
381 modifications required to survive in this wall-deficient state are also being uncovered  
382 which has deepened our understanding of their intriguing biology (Glover, Yang, and  
383 Zhang 2009; Kawai *et al.* 2019). We here show that wall-deficient L-forms are able to  
384 fuse with one another and that membrane fluidity is a key factor influencing fusion  
385 efficiency. Additionally, we show for the first time targeted fusion between wall-  
386 deficient cells using coiled coil lipopeptides. This opens up avenues for application in  
387 the field of biotechnology and the design of synthetic cells.

388 L-forms are surrounded by a membrane, which are be sufficiently fluid to allow  
389 efficient proliferation. *Bacillus subtilis* L-forms that have a defect in formation of  
390 branched chain fatty acid (BCFA) suffer from decreased membrane fluidity and as a  
391 consequence cannot carry out the membrane scission step (Mercier, Domínguez-  
392 Cuevas, and Errington 2012). This phenotype was rescued by supplementing the  
393 media with BCFA in the medium. Less is known about the impact of fluidity on  
394 bacterial fusion, although older reports on eukaryotic muscle cell cultures suggest that  
395 myoblast fusion was preceded by a decrease in membrane viscosity (Prives and  
396 Shinitzky 1977). In this work we showed that the membrane fluidity of *K. viridifaciens*  
397 L-forms changes over time. In younger cultures, the fluidity is higher coinciding with  
398 the ability of such cells to proliferate efficiently. By contrast, the fluidity decreases in  
399 older cultures. The change in fluidity was associated with a change in the ratio of  
400 saturated to unsaturated FAs. In our study we found this ratio to be 4.3 for the 1<sup>st</sup> day  
401 of growth which then increased to 11.3 after 3 days (Fig. 5B). Thus the amount of  
402 saturated FAs responsible for tighter packing increases over time at the expense of  
403 unsaturated FAs. The accumulation of saturated FAs makes the membrane more stiff,  
404 which negatively impacts proliferation and fusion efficiency. Notably, compared to  
405 protoplasts, L-forms of *Streptomyces hygroscopicus* contained 6 times more anteiso  
406 FAs than protoplasts resulting in more fluid membranes (Hoischen *et al.* 1997). Our  
407 lipidomics analysis also indicates that L-form membrane composition comprised  
408 significant amounts of cardiolipin (CL), phosphatidylinositol (PI) and  
409 phosphatidylethanolamine (PE). Both CL and PE are fusogenic headgroups shown to  
410 induce fusion between liposomes and extracellular vesicles (Driessen *et al.* 1985), and  
411 their the presence may also facilitate L-form fusion.



412 A pair of complementary fusogenic coiled coil lipopeptides have been  
413 previously developed for the targeted delivery of compounds into eukaryotic cells  
414 using liposomes. These eukaryotic-liposome models have also been used extensively  
415 to understand the process of cell fusion (Daudey *et al.* 2017). For the first time we  
416 explored targeted fusion with these synthetic lipopeptides between bacterial cells.  
417 Interestingly we observed that the lipopeptides readily insert in membranes of L-forms  
418 via a cholesterol anchor (Fig. 6). These lipopeptides remained in the membrane even  
419 after several washing steps. The lipopeptide segment of CPK<sub>4</sub> is known to interact  
420 both with its binding partner lipopeptide E<sub>4</sub> as well as membranes while the lipopeptide  
421 E<sub>4</sub> segment of CPE<sub>4</sub> does not (Fig. 2). Complementary binding of the lipopeptides  
422 brings two opposing membranes in close proximity and ultimately induces fusion  
423 (Koukalová *et al.* 2018; Robson Marsden *et al.* 2009). The differences in lipopeptide  
424 presentation on the surface can explain the complementarity effect on fusion efficiency  
425 of L-forms as well (Fig. 7). Given the ease of lipopeptide docking and subsequent  
426 stability on the L-forms, coiled coil lipopeptides provide a promising avenue for studies  
427 on targeted compound delivery into wall deficient cells. This may be particularly  
428 relevant for L-forms associated with recurring urinary tract infections and potentially  
429 mycobacterial infections (Mickiewicz *et al.* 2019; Markova 2017).

430 The costs and benefits of living as a wall deficient cell depends on the  
431 environment. Absence of a protective wall makes them sensitive to changes in osmotic  
432 pressure and physical agitation. On the other hand, cells without a wall are resistant  
433 to a whole class of cell wall targeting antibiotics (penicillins, cephalosporins), transport  
434 to the extracellular space is potentially easier and the cells are stably polyploid. These  
435 characteristics can make L-forms a unique model system to study not only cell biology  
436 but also questions in the fields of biotechnology, evolution and the origin of life (Briers  
437 *et al.* 2012; Errington *et al.* 2016; Shitut *et al.* 2020). The process of cell fusion may  
438 have been a mechanism of horizontal gene transfer and species diversification in early  
439 life (Küppers and Zimmermann 1983). Understanding this process is hence a key  
440 aspect of protocell evolution. L-forms are uniquely suited to replicate these processes  
441 thereby providing a mechanistic understanding of the causes and consequences of  
442 such fusion. First, the use of coiled coil directed fusion can be extended to synthetic  
443 cells to obtain fusions that increase cellular complexity. Second, fusion leads to  
444 multiple chromosomes in the same cellular compartment which in turn can result in  
445 genetic recombination. Such recombination events can then be leveraged to identify

446 new microbial products and obtain genomically diverse populations of cells. Finally,  
447 cell-cell fusion can also help to understand major transitions on the road to increased  
448 organismal complexity like multicellularity and endosymbiosis.

449

450

## 451 **Materials and methods**

### 452 *Media and growth conditions*

453 All L-form strains were cultured in liquid L phase broth (LPB) and solid L phase media  
454 agar (LPMA). LPB consists of a 1:1 mixture of yeast extract malt extract (YEME) and  
455 tryptic soy broth supplemented with 10% sucrose (TSBS) and 25 mM MgCl<sub>2</sub>. LPMA  
456 consists of LPB supplemented with 1.5% agar, 5% horse serum and 25 mM MgCl<sub>2</sub>  
457 (Kieser et al. 2000). P-buffer containing sucrose, K<sub>2</sub>SO<sub>4</sub>, MgCl<sub>2</sub>, trace elements,  
458 KH<sub>2</sub>PO<sub>4</sub>, CaCl<sub>2</sub>, TES (Kieser et al. 2000) was used for transformation and all fusion  
459 experiments supplemented with 1 mg/mL DnaseI (Roche Diagnostics GmbH).  
460 Antibiotics apramycin (Duchefa Biochemie) and hygromycin (Duchefa Biochemie)  
461 were used for selection and were added at final concentrations of 50 µg/mL and 100  
462 µg/mL respectively. Growth conditions for all cultures was 30°C in an orbital shaker  
463 (New Brunswick Scientific Innova®) with 100 rpm for the liquid cultures. Centrifugation  
464 (Eppendorf Centrifuge 5424) conditions were always 1000 xg for 10 minutes (< 1 mL)  
465 or 30 minutes (>10 mL) depending on culture volume. The above mentioned culture  
466 conditions and centrifugation settings were applied throughout the study unless  
467 mentioned otherwise. All measurements for optical density of samples was done with  
468 200 µL culture in a 96 well flat bottom plate (Sarstedt) using the Tecan spectramax  
469 platereader.

470

### 471 *Strain and plasmid construction*

472 Wall deficient L-form of *Kitasatospora viridifaciens* was obtained by prolonged  
473 exposure to penicillin and lysozyme similar to a previous study (Ramijan et al. 2018).  
474 Briefly, 10<sup>6</sup> spores of *Kitasatospora viridifaciens* DSM40239 were grown in 50 mL  
475 TSBS media at 30°C and 100 rpm to obtain mycelial biomass. To this biomass 1  
476 mg/mL lysozyme (Sigma Aldrich) and 0.6 mg/mL penicillin (Duchefa Biochemie) was  
477 added to induce S-cell formation. After 7 days, a dense culture of wall-deficient cells  
478 was obtained and subcultured to LPB media containing 6 mg/mL penicillin. This  
479 treatment was continued for 5 weeks with subculture into fresh media every week. The

480 culture was then tested for growth on LPMA without penicillin and showed only L-form  
481 growth. A single colony was picked and inoculated in LPB without penicillin and  
482 incubated for 7 days to confirm stability of wall-deficiency and subsequently used for  
483 making a culture stock to be stored at -80°C.

484 The strain was further genetically modified to harbour antibiotic resistance  
485 genes and fluorescent reporter genes. Two plasmids were used for this purpose  
486 namely pGreen (containing the apramycin resistance gene *aac(3)IV* and a green  
487 fluorescent protein reporter gene) and pRed2 (containing the hygromycin resistance  
488 gene *hph* and a red fluorescent reporter gene). Both plasmids contain the Phi C31  
489 *aatP* site and a Phi C31 integrase which allows for integration of the marker set at the  
490 *attB* site in the genome. The pGreen plasmid was obtained from a previous publication  
491 where details are provided of the construction (Zacchetti *et al.* 2016). The pRed2  
492 plasmid was constructed by introducing the amplified mCherry gene alongwith a *gap1*  
493 promoter region at the XbaI site in the pIJ82 plasmid. Briefly, the mCherry gene was  
494 amplified together with the *gap1* promoter using primers (Sigma) mentioned in  
495 supplementary table 1 and the pRed plasmid (Zacchetti *et al.* 2016) as template. The  
496 amplified *gap1*-mCherry product was purified using a kit following instructions of the  
497 supplier (Illustra™ GFX™ gel band purification kit). The purified product was  
498 introduced into the vector pIJ82 at the XbaI site (New England Biolabs GmbH). This  
499 plasmid was first transformed into *E. coli* DH5alpha for amplification followed by  
500 transformation into *E. coli* ET12567 for demethylation.

501 The plasmids were introduced into the L-forms by polyethylene glycol  
502 (PEG1000 NBS Biologicals) induced transformation similar to protoplast  
503 transformation with some modifications (Kieser *et al.* 2000). L-form cultures were  
504 grown for 4 days. Cultures were centrifuged to remove the spent media and the pellet  
505 was resuspended in 1/4<sup>th</sup> volume P-buffer. Approximately 500 ng plasmid was added  
506 to the resuspended pellet and mixed thoroughly. PEG1000 was added to this mix at a  
507 final concentration of 25 w%w and mixed gently. After a brief incubation of 5 minutes  
508 on the bench the tube was centrifuged. The supernatant was discarded and the pellet  
509 resuspended in LPB medium and incubated for 2 hours. The culture was then  
510 centrifuged again and the pellet resuspended in 100 µL LPB for plating on LPMA  
511 media containing selective antibiotics apramycin or hygromycin. After 4 days of  
512 incubation single colonies were picked and restreaked on LPMA with antibiotics for  
513 confirmation along with fluorescence microscopy. The resulting strains were named

514 AG for Apramycin-Green and HR for Hygromycin-Red and will be referred so  
515 henceforth.

516 To test the antibiotic susceptibility, both strains were grown on LPMA containing  
517 with or without either 50 µg/mL apramycin or 100 µg/mL hygromycin for 4 days.  
518 Stepwise 10-fold dilution plating was done which allowed for quantifying the number  
519 of colonies (CFU/mL).

520

#### 521 *L-form fusion*

522 Strains AG and HR were grown individually from culture stocks in 20 mL LPB  
523 containing the relevant antibiotic. Grown cultures were then centrifuged to remove  
524 spent media containing antibiotics and washed with P-buffer twice. The pellet was  
525 finally resuspended in 2-3 mL of P-buffer containing DNase I (1 mg/mL) and the  
526 density was adjusted to 0.6 OD<sub>600</sub>. Both strains were then mixed in equal volumes  
527 (200 µL) in a fresh microfuge tube and mixed gently followed by incubation at room  
528 temperature for 10 minutes. Depending on the treatment, PEG1000 was added at the  
529 desired concentration (0 to 50 w%) and mixed by pipetting. For the effect of  
530 centrifugation on L-form fusion no PEG was added. After a brief incubation of 5  
531 minutes the tubes were centrifuged and the supernatant was discarded. The pellet  
532 was resuspended in 100 µL of P-buffer with DNase I and serial dilutions were  
533 subsequently plated on LPMA with both antibiotics. Controls were also plated on the  
534 same medium such as 100 µL monocultures of each strain to test for cross resistance  
535 and 100 µL of 1:1 mix of each strain without fusion (supplementary figure 1). All plates  
536 were incubated for 3 days after which colony forming units were calculated to  
537 determine the fusion efficiency. Efficiency was quantified as the CFU/mL on double  
538 antibiotic selection media normalized by the CFU/mL of monocultures grown on single  
539 antibiotic selection media.

540

#### 541 *Microscopy*

542 A Zeiss LSM 900 airyscan 2 microscope was used to image the fluorescently labeled  
543 strains under 40x magnification. For EGFP an excitation wavelength of 488 nm was  
544 used and emission captured at 535 nm whereas for mCherry an excitation wavelength  
545 of 535 nm was used and emission captured at 650 nm. Multichannel (fluorescence  
546 and brightfield), multi-stack images were captured using the Zen software (Zeiss) and  
547 further analyzed using ImageJ/Fiji. Multiple tiles were imaged for colonies to cover a

548 large area. These tiles were then stitched and each fluorescence channel was first  
549 thresholded to determine the total pixel area. These thresholded images were then  
550 used to calculate total area (using the OR function in image calculator) and the fused  
551 area (using the AND function). The total area selection was then used to calculate  
552 individual pixel area occupied by either green or red pixels and by both.

553 The Lionheart FX automated microscope (BioTek) was used for timelapse  
554 imaging of double labeled L-forms after fusion. The fusant strains were precultured in  
555 LPB containing both antibiotics for 3 days. These were then centrifuged and  
556 resuspended in fresh media with antibiotics and 100  $\mu$ L of this was added to individual  
557 wells in a 96 well black/clear bottom sensoplate (Thermoscientific). The plate was  
558 centrifuged for 5 minutes to enable settling of cells. The timelapse imaging was done  
559 using a 63x dry objective, set for 3 channels (brightfield, green and red) with imaging  
560 every 10 minutes for 16 hours at 30°C. The LED intensity for all channels was 10 and  
561 a camera gain of 24. The exposure time was set at the beginning of the imaging  
562 according to the reference monoculture strains AG and HR.

563

#### 564 *Membrane fluidity assay*

565 The membrane fluidity was quantified for cultures of different age and cultures treated  
566 with different lipopeptides using the Laurdan dye assay (Scheinflug, Krylova, and  
567 Strahl 2017). All cultures grown in 40 mL volume were first centrifuged followed by  
568 resuspension in P-buffer and density adjusted to 0.6 to 0.8 OD<sub>600</sub>. The cultures were  
569 then aliquot according to the treatment for a given biological replicate (i.e. 5 aliquots  
570 of 1 mL each for 5 treatments). In case of lipopeptide treatment the lipopeptide was  
571 added to the culture at required concentration (5  $\mu$ M, 10  $\mu$ M or 100  $\mu$ M) and all tubes  
572 were incubated for 30 minutes at 100 rpm. Centrifugation was carried out to remove  
573 excess lipopeptide and the pellet was resuspended in P-buffer. The P-buffer for this  
574 assay was always maintained at 30°C so as not to alter fluidity of the membrane. 10  
575 mM Laurdan (6-Dodecanoyl-2-Dimethylaminonaphthalene, Invitrogen) stock solution  
576 was prepared in 100% dimethylformamide (DMF, Sigma) and stored at -20°C in an  
577 amber tube to protect from light exposure. This stock solution was used to get a final  
578 concentration of 10  $\mu$ M in the resuspended cultures above. The tubes were inverted  
579 to mix the dye sufficiently and then incubated at 30°C for 10 minutes and covered with  
580 foil to protect from light exposure. The cultures were then washed 3x in pre-warmed  
581 P-buffer containing 1% dimethylsulfoxide (DMSO, Sigma) to ensure removal of

582 unbound dye molecules. The final suspension was done in pre-warmed P-buffer and  
583 200  $\mu$ L was transferred to a 96 well black/clear bottom sensoplate (Thermoscientific)  
584 for spectroscopy. Fluorescent intensities were measured by excitation at 350 nm and  
585 two emission wavelengths (435 and 490 nm). The background values were first  
586 subtracted from all sample values followed by estimation of the generalized  
587 polarization (GP) value.

$$GP = \frac{I_{435} - I_{490}}{I_{435} + I_{490}}$$

588 The GP value ranges from -1 to +1 with low values corresponding to high membrane  
589 fluidity.

590

### 591 *Lipid extraction and analysis*

592 Cultures of the wildtype L-form were grown for different time periods (1, 3, 5 and 7  
593 days). These were centrifuged and resuspended in P-buffer prior to membrane  
594 lipidomics. Lipids were extracted using a modified MTBE protocol of Matyash, V. et  
595 al. (ref. 10.1194/jlr.D700041-JLR200). In short, 600  $\mu$ L MTBE and 150  $\mu$ L methanol  
596 were added to the thawed bacteria samples. Samples were briefly vortexed, ultra-  
597 sonicated for 10 minutes and shaken at room temperature for 30 minutes. Next, 300  
598  $\mu$ L water was added and the samples were centrifuged for 5 minutes at 18213  $\times$ g at  
599 20 °C. After centrifugation, the upper layer was collected and transferred to a glass  
600 vial. The extraction was repeated by adding 300  $\mu$ L MTBE and 100  $\mu$ L methanol.  
601 Samples were briefly vortexed and shaken at room temperature for 5 minutes. Next,  
602 100  $\mu$ L water was added and the samples were centrifuged for 5 minutes at 18213  
603  $\times$ g at 20 °C. After centrifugation, the upper layer was collected, and the organic  
604 extracts combined. Samples were dried under a gentle stream of nitrogen. After  
605 drying samples were reconstituted in 100  $\mu$ L 2-propanol. After briefly vortexing and  
606 ultra-sonication for 5 minutes, 100  $\mu$ L water was added. Samples were transferred to  
607 microvial inserts for analysis

608 Lipidomic analysis of bacteria lipid extracts was performed using a LC-MS/MS  
609 based lipid profiling method (PMID: 31972163 DOI: 10.1016/j.bbamem.2020.183200).  
610 A Shimadzu Nexera X2 (consisting of two LC30AD pumps, a SIL30AC autosampler,  
611 a CTO20AC column oven and a CBM20A controller) (Shimadzu, 's Hertogenbosch,  
612 The Netherlands) was used to deliver a gradient of water:acetonitrile 80:20 (eluent A)  
613 and water:2-propanol:acetonitrile 1:90:9 (eluent B). Both eluents contained 5 mM

614 ammonium formate and 0.05% formic acid. The applied gradient, with a column flow  
615 of 300  $\mu\text{L}/\text{min}$ , was as follows: 0 min 40% B, 10 min 100% B, 12 min 100% B. A  
616 Phenomenex Kinetex C18, 2.7  $\mu\text{m}$  particles, 50  $\times$  2.1 mm (Phenomenex, Utrecht, The  
617 Netherlands) was used as column with a Phenomenex SecurityGuard Ultra C8, 2.7  
618  $\mu\text{m}$ , 5  $\times$  2.1 mm cartridge (Phenomenex, Utrecht, The Netherlands) as guard column.  
619 The column was kept at 50  $^{\circ}\text{C}$ . The injection volume was 10  $\mu\text{L}$ .

620 The MS was a Sciex TripleTOF 6600 (AB Sciex Netherlands B.V., Nieuwerkerk  
621 aan den IJssel, The Netherlands) operated in positive (ESI+) and negative (ESI-) ESI  
622 mode, with the following conditions: ion source gas 1 45 psi, ion source gas 2 50 psi,  
623 curtain gas 35 psi, temperature 350 $^{\circ}\text{C}$ , acquisition range  $m/z$  100-1800, ion spray  
624 Voltage 5500 V (ESI+) and -4500 V (ESI-), declustering potential 80 V (ESI+) and -80  
625 V (ESI-). An information dependent acquisition (IDA) method was used to identify  
626 lipids, with the following conditions for MS analysis: collision energy  $\pm 10$ , acquisition  
627 time 250 ms and for MS/MS analysis: collision energy  $\pm 45$ , collision energy spread 25,  
628 ion release delay 30, ion release width 14, acquisition time 40 ms. The IDA switching  
629 criteria were set as follows: for ions greater than  $m/z$  300, which exceed 200 cps,  
630 exclude former target for 2 s, exclude isotopes within 1.5 Da, max. candidate ions 20.  
631 Before data analysis, raw MS data files were converted with the Reifycs Abf Converter  
632 (v1.1) to the Abf file format. MS-DIAL (v4.20), with the FiehnO (VS68) database was  
633 used to align the data and identify the different lipids (Tsugawa et al. 2015; 2019;  
634 2020). Further processing of the data was done with R version 4.0.2 (R Core Team  
635 2014).

636 The relative abundance of specific lipid class vs total relative abundance was  
637 used to roughly compare the ratio of each lipid class. The lipids have been sorted into  
638 saturated and unsaturated lipids classes. Also, the lipids have been sorted based on  
639 head groups (DG, TG, PE, PI) and the ratio of each class have been calculated

640

#### 641 *Lipopeptide preparation and treatment*

642 Peptide K<sub>4</sub> and E<sub>4</sub> were synthesized on a CEM Liberty Blue microwave-assisted  
643 peptide synthesizer using Fmoc chemistry. 20% piperidine in DMF was used as the  
644 deprotection agent. During coupling, DIC was applied as the activator and Oxyma as  
645 the base. All peptides were synthesized on a Tentagel S RAM resin (0.22 mmol/g).  
646 The resin was swelling for at least 15min before synthesis started. For the coupling, 5

647 equivalents of amino acids (2.5 mL in DMF), DIC (1 mL in DMF) and Oxyma (0.5 mL  
648 in DMF) were added to the resin in the reaction vessel and were heated to 90 °C for 4  
649 minutes to facilitate the reaction. For deprotection, 20% of piperidine (4 mL in DMF)  
650 was used and heated to 90°C for 1 minute. Between deprotection and peptide  
651 coupling, the resin has been washed three times using DMF. After peptide synthesis,  
652 a polyethyleneglycol (PEG)<sub>4</sub> linker and cholesterol were coupled manually to the  
653 peptide on-resin. 0.1 mmol of each peptide was reacted with 0.2 mmol N<sub>3</sub>-PEG<sub>4</sub>-  
654 COOH by adding 0.4 mmol HCTU and 0.6 mmol DIPEA in 3 mL DMF. The reaction  
655 was performed at room temperature for 5 hours. After thorough washing, 3 mL of 0.5  
656 mmol trimethylphosphine in a 1,4-dioxane:H<sub>2</sub>O (6:1) mixture was added to the resin  
657 to reduce the azide group to an amine (overnight reaction). After reduction, the peptide  
658 was reacted with cholesteryl hemisuccinate (0.3 mmol) in DMF by adding 0.4 mmol  
659 HCTU and 0.6 mmol DIPEA. The reaction was performed at room temperature for 3  
660 hours. Lipopeptides were cleaved from the resin using 3 mL of a TFA:triisopropylsilane  
661 (97.5:2.5%) mixture and shaking for 50 min. After cleavage, the crude lipopeptides  
662 were precipitated by pouring into 45 mL of -20 °C diethyl ether:n-hexane (1:1) and  
663 isolated by centrifugation. The pellet of the lipopeptides was redissolved by adding 20  
664 mL H<sub>2</sub>O containing 10% acetonitrile and freeze-dried to yield a white powder.  
665 Lipopeptides were purified with reversed-phase HPLC on a Shimadzu system with two  
666 LC-8A pumps and an SPD-20A UV-Vis detector, equipped with a Vydac C4 column  
667 (22 mm diameter, 250 mm length, 10 µm particle size). CPK4 was purified using a  
668 linear gradient from 20 to 65 % acetonitrile in water (with 0.1% TFA) with a 12 mL/min  
669 flow rate over 36 mins. CPE4 was purified using a linear gradient from 20 to 75 %  
670 acetonitrile in water (with 0.1% TFA) with a 12 mL/min flow rate over 36 mins. After  
671 HPLC purification, all peptides were lyophilized and yielded white powders.  
672 For the fluo-K<sub>4</sub> and fluo-E<sub>4</sub> synthesis, two additional glycine residues were coupled to  
673 the N-terminus of the peptides on resin, before the dye was manually coupled by  
674 adding 3 mL DMF containing 0.2 mmol 5(6)-carboxyfluorescein, 0.4 mmol HCTU and  
675 0.6 mmol DIPEA. The reaction was left at room temperature overnight. The fluo-K<sub>4</sub>  
676 and fluo-E<sub>4</sub> were cleaved from the resin using 3 mL of a TFA:triisopropylsilane:H<sub>2</sub>O  
677 (97.5:2.5%) mixture and shaking for 1.5 hours. After cleavage, the crude lipopeptides  
678 were precipitated by pouring into 45 mL of -20 °C diethyl ether and isolated by  
679 centrifugation. The pellet of the lipopeptides was redissolved by adding 20 mL H<sub>2</sub>O



680 containing 10% acetonitrile and freeze-dried to yield a white powder. Fluo-K<sub>4</sub> and fluo-  
681 E<sub>4</sub> were purified using the same HPLC described above equipped with a Kinetix Evo  
682 C18 column (21.2 mm diameter, 150 mm length, 5 µm particle size). For the fluo-K<sub>4</sub>,  
683 a linear gradient from 20 to 45% acetonitrile in water (with 0.1% TFA) with a 12 mL/min  
684 flow rate over 28 mins was used. For fluo-E<sub>4</sub>, linear gradient from 20 to 55% was used.  
685 After HPLC purification, all peptides were lyophilized and yielded orange powders.  
686 The purity of all peptides were determined by LC-MS (supplementary table 2). The  
687 structure of all peptides used in this study can be found in supplementary figure 3.  
688 Treatment of cultures with different peptides was done by adding externally to cells  
689 suspended in P-buffer and incubating for 30 minutes at 30°C 100 rpm. Excess peptide  
690 was washed by centrifugation.

691

#### 692 *L-form membrane labelling*

693 3×10<sup>8</sup> wild type L-forms were suspended in 1 mL of P-buffer. 10 µL of CPK<sub>4</sub> or CPE<sub>4</sub>  
694 (10 mM in DMSO) was added to the L-form suspension to a final concentration of 100  
695 µM. After 30 min incubation at 30 °C with shaking at 100 rpm, the L-forms were washed  
696 two times by centrifugation using P-buffer. The L-forms were then suspended in 900  
697 µL P-buffer and 100 µL of fluo-K<sub>4</sub> or fluo-E<sub>4</sub> (200 µM in P-buffer) was added to a final  
698 concentration of 20 µM. After 5min incubation, the L-forms were washed three times  
699 using P-buffer to get rid of the free fluorescent lipopeptides. For control experiments,  
700 fluo-K<sub>4</sub> or fluo-E<sub>4</sub> were added to non-lipopeptide modified L-form and incubated for 5  
701 min. L-form imaging was performed on a Leica SP8 confocal microscopy. Excitation:  
702 488 nm, emission: 500-550 nm.

703

#### 704 *Peptide induced L-form fusion*

705 Strains AG and HR were grown individually from culture stocks in 20 mL LPB  
706 containing the relevant antibiotic. Grown cultures were then centrifuged to remove  
707 spent media containing antibiotics and washed with P-buffer twice. The pellet was  
708 finally resuspended in 2-3 mL of P-buffer containing DNase I (1 mg mL<sup>-1</sup>) and the  
709 density was adjusted to 0.6 OD<sub>600</sub>. Peptides were added at required concentrations to  
710 1 ml cultures of individual strains AG and HR. Cultures were then incubated for 30  
711 minutes at 30 °C with shaking at 100 rpm. Excess and unbound peptide was removed  
712 via centrifugation and resuspension of pellet in 1 ml P buffer containing DNase I. Both  
713 strains were then mixed in equal volumes (200 µL) in a fresh microfuge tube and mixed

714 gently followed by incubation at room temperature for 10 minutes. Depending on the  
715 treatment cultures were centrifuged followed by treatment with PEG1000 or simply  
716 centrifuged. The pellet was resuspended in 100  $\mu$ L of P-buffer with DNase I and serial  
717 dilutions were subsequently plated on LPMA with both antibiotics. Controls were also  
718 plated on the same medium such as 100  $\mu$ L monocultures of each strain to test for  
719 cross resistance and 100  $\mu$ L of 1:1 mix of each strain without fusion (supplementary  
720 figure 1). All plates were incubated for 3 days after which colony forming units were  
721 calculated to determine the fusion efficiency. Efficiency was quantified as the CFU/mL  
722 on double antibiotic selection media normalized by the CFU/mL of monocultures  
723 grown on single antibiotic selection media.

724

#### 725 *Statistical analysis and graphs*

726 Statistical analysis of all datasets was done in R version 3.6.1 (R Core Team 2014)  
727 using built-in packages. The specific tests performed are mentioned in the results and  
728 figure legends. All graphs were produced using the package ggplot2 (Wickham, H.  
729 2009).

730

#### 731 Acknowledgements

732 We thank members of the Claessen lab and Kros lab for fruitful discussions and  
733 suggestions. S.S. acknowledges the NWA startimpulse (Origins Centre) for funding.

734

735

#### 736 Author contribution

737 S.S., D.C, and A.K. designed the project. S.S. performed all experiments. S.S. and  
738 M.S. performed peptide fusion experiments. M.S. prepared all lipopeptides and did  
739 microscopy for lipopeptide docking experiments. B.C. prepared the cell-wall-deficient  
740 line of *K. viridifaciens* used in the study. R.D. and M.G. performed the membrane lipid  
741 analysis. S.S., D.R., D.C. and A.K. acquired funding. S.S. wrote the first draft followed  
742 by revisions from all authors. All authors approved the final manuscript.

743

744

745

746

747

748 References

- 749 Adamala, Katarzyna, and Pier Luigi Luisi. 2011. "Experimental Systems to Explore  
750 Life Origin: Perspectives for Understanding Primitive Mechanisms of Cell  
751 Division." *Cell Cycle in Development*, 1–9.
- 752 Baltz, Richard H., and Patti Matsushima. 1981. "Protoplast Fusion in Streptomyces:  
753 Conditions for Efficient Genetic Recombination and Cell Regeneration."  
754 *Microbiology*,. Microbiology Society,.
- 755 Bessa, Lucinda J., Mariana Ferreira, and Paula Gameiro. 2018. "Evaluation of  
756 Membrane Fluidity of Multidrug-Resistant Isolates of Escherichia Coli and  
757 Staphylococcus Aureus in Presence and Absence of Antibiotics." *Journal of*  
758 *Photochemistry and Photobiology B: Biology* 181 (April): 150–56.
- 759 Briers, Yves, Peter Walde, Markus Schuppler, and Martin J. Loessner. 2012. "How  
760 Did Bacterial Ancestors Reproduce? Lessons from L-Form Cells and Giant  
761 Lipid Vesicles." *BioEssays* 34 (12): 1078–84.
- 762 Chen, Elizabeth H., Eric Grote, William Mohler, and Agnès Vignery. 2007. "Cell–Cell  
763 Fusion." *Membrane Trafficking* 581 (11): 2181–93.
- 764 Chernomordik, L., M. M. Kozlov, and J. Zimmerberg. 1995. "Lipids in Biological  
765 Membrane Fusion." *The Journal of Membrane Biology* 146 (1): 1–14.
- 766 Claessen, Dennis, and Jeff Errington. 2019. "Cell Wall Deficiency as a Coping  
767 Strategy for Stress." *Trends in Microbiology* 27 (12): 1025–33.
- 768 Daudey, Geert A., Harshal R. Zope, Jens Voskuhl, Alexander Kros, and Aimee L.  
769 Boyle. 2017. "Membrane-Fusogen Distance Is Critical for Efficient Coiled-Coil-  
770 Peptide-Mediated Liposome Fusion." *Langmuir* 33 (43): 12443–52.
- 771 Driessen, A J, D Hoekstra, G Scherphof, R D Kalicharan, and J Wilschut. 1985. "Low  
772 PH-Induced Fusion of Liposomes with Membrane Vesicles Derived from  
773 Bacillus Subtilis." *Journal of Biological Chemistry* 260 (19): 10880–87.
- 774 Errington, Jeff, Katarzyna Mickiewicz, Yoshikazu Kawai, and Ling Juan Wu. 2016.  
775 "L-Form Bacteria, Chronic Diseases and the Origins of Life." *Philosophical*  
776 *Transactions of the Royal Society B: Biological Sciences* 371 (1707):  
777 20150494
- 778 Glover, William A., Yanqin Yang, and Ying Zhang. 2009. "Insights into the Molecular  
779 Basis of L-Form Formation and Survival in Escherichia Coli." *PLOS ONE* 4  
780 (10): e7316.
- 781 Gokhale, D.V., U.S. Puntambekar, and D.N. Deobagkar. 1993. "Protoplast Fusion: A  
782 Tool for Intergeneric Gene Transfer in Bacteria." *Biotechnology Advances* 11  
783 (2): 199–217.
- 784 Hanczyc, Martin M, and Jack W Szostak. 2004. "Replicating Vesicles as Models of  
785 Primitive Cell Growth and Division." *Current Opinion in Chemical Biology* 8  
786 (6): 660–64.
- 787 Hanson, Phyllis I, John E Heuser, and Reinhard Jahn. 1997. "Neurotransmitter  
788 Release — Four Years of SNARE Complexes." *Current Opinion in*  
789 *Neurobiology* 7 (3): 310–15.
- 790 Hoischen, C, K Gura, C Luge, and J Gumpert. 1997. "Lipid and Fatty Acid  
791 Composition of Cytoplasmic Membranes from Streptomyces Hygroscopicus  
792 and Its Stable Protoplast-Type L Form." *Journal of Bacteriology* 179 (11):  
793 3430.
- 794 Innes, C.M.J., and E.J. Allan. 2001. "Induction, Growth and Antibiotic Production of  
795 Streptomyces Viridifaciens L-Form Bacteria." *Journal of Applied Microbiology*  
796 90 (3): 301–8.

- 797 Kawai, Yoshikazu, Romain Mercier, Katarzyna Mickiewicz, Agnese Serafini, Luiz  
798 Pedro Sório de Carvalho, and Jeff Errington. 2019. "Crucial Role for Central  
799 Carbon Metabolism in the Bacterial L-Form Switch and Killing by  $\beta$ -Lactam  
800 Antibiotics." *Nature Microbiology* 4 (10): 1716–26.
- 801 Kieser, Tobias, Mervyn J. Bibb, Mark J. Buttner, Keith F. Chater, and David A.  
802 Hopwood. 2000. *Practical Streptomyces Genetics*. Vol. 291. John Innes  
803 Foundation Norwich.
- 804 Kong, Li, Quanchi Chen, Frederick Campbell, Ewa Snaar-Jagalska, and Alexander  
805 Kros. 2020. "Light-Triggered Cancer Cell Specific Targeting and Liposomal  
806 Drug Delivery in a Zebrafish Xenograft Model." *Advanced Healthcare  
807 Materials* 9 (6): 1901489.
- 808 Kotnik, Tadej. 2013. "Lightning-Triggered Electroporation and Electrofusion as  
809 Possible Contributors to Natural Horizontal Gene Transfer." *Physics of Life  
810 Reviews* 10 (3): 351–70.
- 811 Koukalová, Alena, Šárka Pokorná, Aimee L. Boyle, Nestor Lopez Mora, Alexander  
812 Kros, Martin Hof, and Radek Šachl. 2018. "Distinct Roles of SNARE-  
813 Mimicking Lipopeptides during Initial Steps of Membrane Fusion." *Nanoscale*  
814 10 (40): 19064–73.
- 815 Küppers, G., and U. Zimmermann. 1983. "Cell Fusion by Spark Discharge and Its  
816 Relevance for Evolutionary Processes." *FEBS Letters* 164 (2): 323–29.
- 817 MacDonald, Ruby I. 1985. "Membrane Fusion Due to Dehydration by Polyethylene  
818 Glycol, Dextran, or Sucrose." *Biochemistry* 24 (15): 4058–66.
- 819 Markova, Nadya. 2017. "L-Form Bacteria Cohabitants in Human Blood: Significance  
820 for Health and Diseases." *Discovery Medicine* 23 (128): 305–13.
- 821 Marrink, Siewert J., and Alan E. Mark. 2003. "The Mechanism of Vesicle Fusion as  
822 Revealed by Molecular Dynamics Simulations." *Journal of the American  
823 Chemical Society* 125 (37): 11144–45.
- 824 Mercier, Romain, Patricia Domínguez-Cuevas, and Jeff Errington. 2012. "Crucial  
825 Role for Membrane Fluidity in Proliferation of Primitive Cells." *Cell Reports* 1  
826 (5): 417–23.
- 827 Mercier, Romain, Yoshikazu Kawai, and Jeff Errington. 2013. "Excess Membrane  
828 Synthesis Drives a Primitive Mode of Cell Proliferation." *Cell* 152 (5): 997–  
829 1007.
- 830 Mercier, Romain, Yoshikazu Kawai, and Jeff Errington. 2014. "General Principles for  
831 the Formation and Proliferation of a Wall-Free (L-Form) State in Bacteria."  
832 *ELife* 3 (October): e04629.
- 833 Mickiewicz, Katarzyna M, Yoshikazu Kawai, Lauren Drage, Margarida C Gomes,  
834 Frances Davison, Robert Pickard, Judith Hall, Serge Mostowy, Phillip D  
835 Aldridge, and Jeff Errington. 2019. "Possible Role of L-Form Switching in  
836 Recurrent Urinary Tract Infection." *Nature Communications* 10 (1): 4379–  
837 4379.
- 838 Monnard, Pierre-Alain, and David W. Deamer. 2002. "Membrane Self-Assembly  
839 Processes: Steps toward the First Cellular Life." *The Anatomical Record* 268  
840 (3): 196–207.
- 841 Naor, Adit, and Uri Gophna. 2013. "Cell Fusion and Hybrids in Archaea."  
842 *Bioengineered* 4 (3): 126–29.
- 843 Ogle, Brenda M., Marilia Cascalho, and Jeffrey L. Platt. 2005. "Biological  
844 Implications of Cell Fusion." *Nature Reviews Molecular Cell Biology* 6 (7):  
845 567–75.

- 846 Prives, J., and M. Shinitzky. 1977. "Increased Membrane Fluidity Precedes Fusion of  
847 Muscle Cells." *Nature* 268 (5622): 761–63.
- 848 R Core Team. 2014. *R: A Language and Environment for Statistical Computing*.  
849 Vienna, Austria.: R Foundation for Statistical Computing.
- 850 Rabe, Martin, Christian Schwieger, Harshal R. Zope, Frank Versluis, and Alexander  
851 Kros. 2014. "Membrane Interactions of Fusogenic Coiled-Coil Peptides:  
852 Implications for Lipopeptide Mediated Vesicle Fusion." *Langmuir* 30 (26):  
853 7724–35.
- 854 Ramijan, Karina, Eveline Ultee, Joost Willemse, Zheren Zhang, Joeri A. J.  
855 Wondergem, Anne van der Meij, Doris Heinrich, Ariane Briegel, Gilles P. van  
856 Wezel, and Dennis Claessen. 2018. "Stress-Induced Formation of Cell Wall-  
857 Deficient Cells in Filamentous Actinomycetes." *Nature Communications* 9 (1):  
858 5164.
- 859 Robson Marsden, Hana, Nina A. Elbers, Paul HH Bomans, Nico AJM Sommerdijk,  
860 and Alexander Kros. 2009. "A Reduced SNARE Model for Membrane Fusion."  
861 *Angewandte Chemie* 121 (13): 2366–69.
- 862 Robson Marsden, Hana, and Alexander Kros. 2010. "Self-Assembly of Coiled Coils  
863 in Synthetic Biology: Inspiration and Progress." *Angewandte Chemie*  
864 *International Edition* 49 (17): 2988–3005.
- 865 Scheinpflug, Kathi, Oxana Krylova, and Henrik Strahl. 2017. "Measurement of Cell  
866 Membrane Fluidity by Laurdan GP: Fluorescence Spectroscopy and  
867 Microscopy." In *Antibiotics: Methods and Protocols*, edited by Peter Sass,  
868 159–74. New York, NY: Springer New York.
- 869 Shitut, Shraddha, Güniz Ö. Bergman, Alexander Kros, Daniel E. Rozen, and Dennis  
870 Claessen. 2020. "Use of Permanent Wall-Deficient Cells as a System for the  
871 Discovery of New-to-Nature Metabolites." *Microorganisms* 8 (12).
- 872 Smeijers, A. F., A. J. Markvoort, K. Pieterse, and P. A. J. Hilbers. 2006. "A Detailed  
873 Look at Vesicle Fusion." *The Journal of Physical Chemistry B* 110 (26):  
874 13212–19.
- 875 Soucy, Shannon M., Jinling Huang, and Johann Peter Gogarten. 2015. "Horizontal  
876 Gene Transfer: Building the Web of Life." *Nature Reviews Genetics* 16 (8):  
877 472–82.
- 878 Studer, Patrick, Titu Staubli, Noémi Wieser, Patrick Wolf, Markus Schuppler, and  
879 Martin J Loessner. 2016. "Proliferation of *Listeria Monocytogenes* L-Form  
880 Cells by Formation of Internal and External Vesicles." *Nature Communications*  
881 7 (November): 13631–13631.
- 882 Svetina, Saša. 2009. "Vesicle Budding and the Origin of Cellular Life."  
883 *ChemPhysChem* 10 (16): 2769–76.
- 884 Szostak, Jack W., David P. Bartel, and P. Luigi Luisi. 2001. "Synthesizing Life."  
885 *Nature* 409 (6818): 387–90.
- 886 Tsugawa, Hiroshi, Tomas Cajka, Tobias Kind, Yan Ma, Brendan Higgins, Kazutaka  
887 Ikeda, Mitsuhiro Kanazawa, Jean VanderGheynst, Oliver Fiehn, and Masanori  
888 Arita. 2015. "MS-DIAL: Data-Independent MS/MS Deconvolution for  
889 Comprehensive Metabolome Analysis." *Nature Methods* 12 (6): 523–26.
- 890 Tsugawa, Hiroshi, Kazutaka Ikeda, Mikiko Takahashi, Aya Satoh, Yoshifumi Mori,  
891 Haruki Uchino, Nobuyuki Okahashi, et al. 2020. "A Lipidome Atlas in MS-DIAL  
892 4." *Nature Biotechnology* 38 (10): 1159–63.
- 893 Tsugawa, Hiroshi, Ryo Nakabayashi, Tetsuya Mori, Yutaka Yamada, Mikiko  
894 Takahashi, Amit Rai, Ryosuke Sugiyama, et al. 2019. "A Cheminformatics

895           Approach to Characterize Metabolomes in Stable-Isotope-Labeled  
896           Organisms.” *Nature Methods* 16 (4): 295–98.

897   Versluis, Frank, Jens Voskuhl, Bartjan van Kolck, Harshal Zope, Marien Bremmer,  
898           Tjerk Albregtse, and Alexander Kros. 2013. “In Situ Modification of Plain  
899           Liposomes with Lipidated Coiled Coil Forming Peptides Induces Membrane  
900           Fusion.” *Journal of the American Chemical Society* 135 (21): 8057–62.

901   Wickham, H. 2009. *Ggplot2: Elegant Graphics for Data Analysis*. Springer New York.

902   Wojcieszyn, J W, R A Schlegel, K Lumley-Sapanski, and K A Jacobson. 1983.  
903           “Studies on the Mechanism of Polyethylene Glycol-Mediated Cell Fusion  
904           Using Fluorescent Membrane and Cytoplasmic Probes.” *Journal of Cell  
905           Biology* 96 (1): 151–59.

906   Yang, Jian, Azadeh Bahreman, Geert Daudey, Jeroen Bussmann, René C. L.  
907           Olsthoorn, and Alexander Kros. 2016. “Drug Delivery via Cell Membrane  
908           Fusion Using Lipopeptide Modified Liposomes.” *ACS Central Science* 2 (9):  
909           621–30.

910   Yang, Jian, Yasuhito Shimada, René C. L. Olsthoorn, B. Ewa Snaar-Jagalska,  
911           Herman P. Spaink, and Alexander Kros. 2016. “Application of Coiled Coil  
912           Peptides in Liposomal Anticancer Drug Delivery Using a Zebrafish Xenograft  
913           Model.” *ACS Nano* 10 (8): 7428–35.

914   Zacchetti, Boris, Joost Willemse, Brand Recter, Dino van Dissel, Gilles P. van  
915           Wezel, H. A. B. Wösten, and Dennis Claessen. 2016. “Aggregation of  
916           Germlings Is a Major Contributing Factor towards Mycelial Heterogeneity of  
917           Streptomyces.” *Scientific Reports* 6 (1): 27045.

918   Zito, Francesca, Nadia Lampiasi, Igor Kireev, and Roberta Russo. 2016. “United We  
919           Stand: Adhesion and Molecular Mechanisms Driving Cell Fusion across  
920           Species.” *European Journal of Cell Biology* 95 (12): 552–62.

921   Zope, Harshal R., Frank Versluis, Anita Ordas, Jens Voskuhl, Herman P. Spaink,  
922           and Alexander Kros. 2013. “In Vitro and In Vivo Supramolecular Modification  
923           of Biomembranes Using a Lipidated Coiled-Coil Motif.” *Angewandte Chemie  
924           International Edition* 52 (52): 14247–51.

925

926

927

928

929

930

931

932
